# Supplementary material
Source: PubMed Central journal article supplement (PMC3365679)

# SUPPLEMENTARY FIGURES

## Figure S2

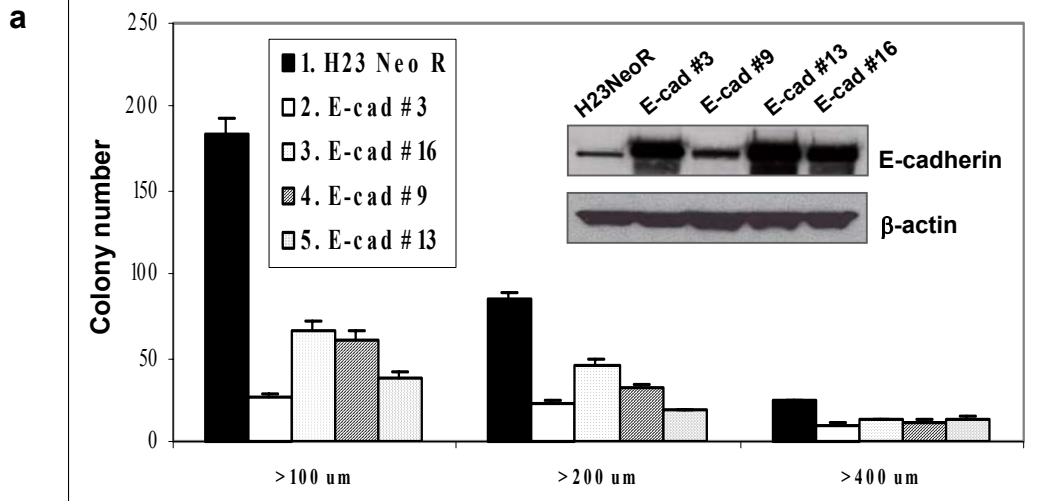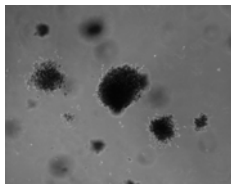

H23 NeoR

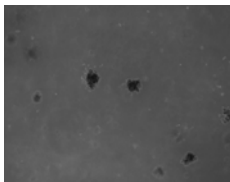

E-cad #3

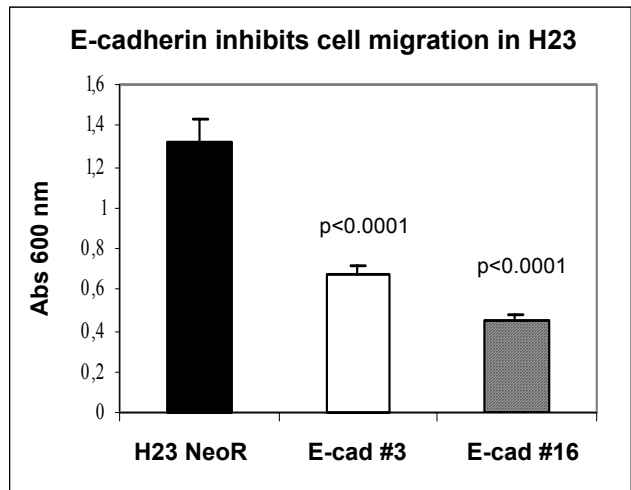

**Figure S2**

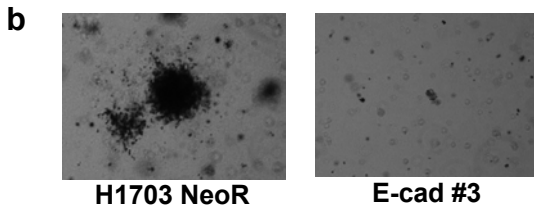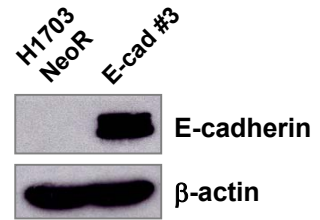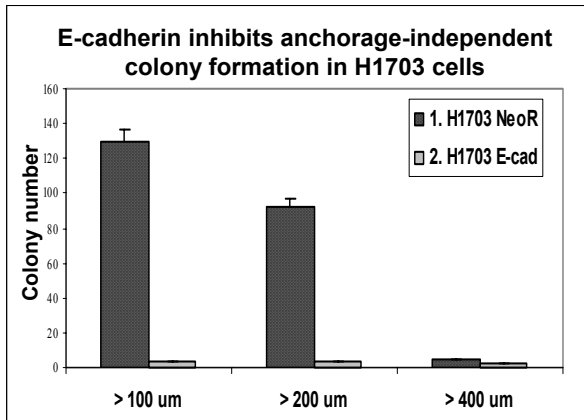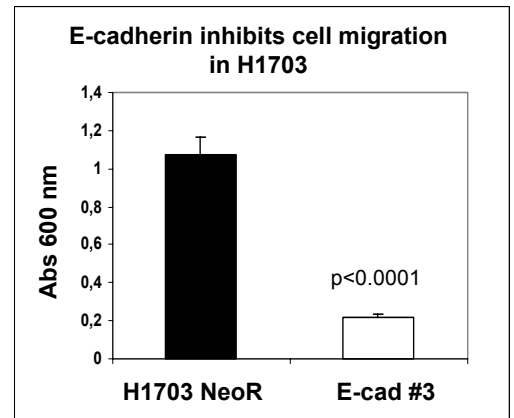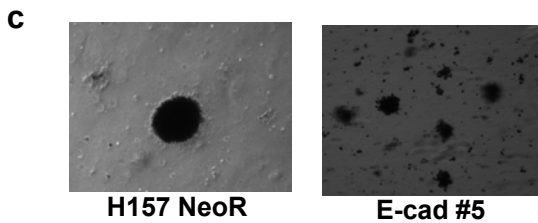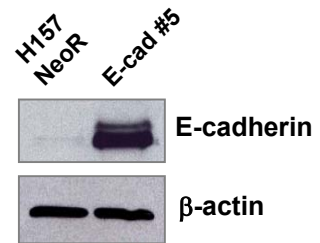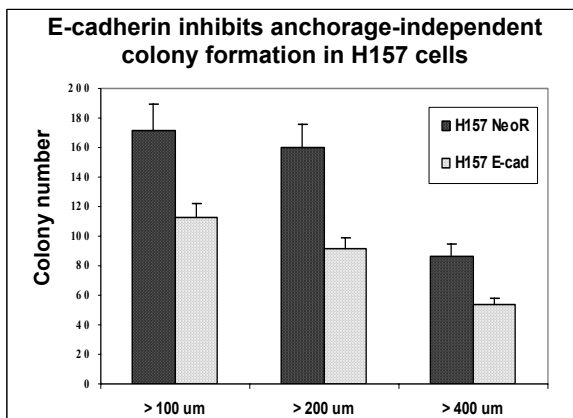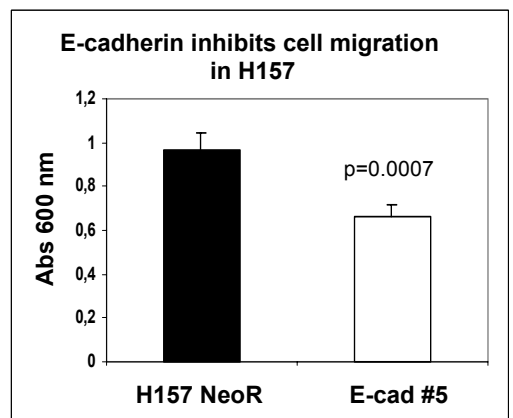

Figure S3

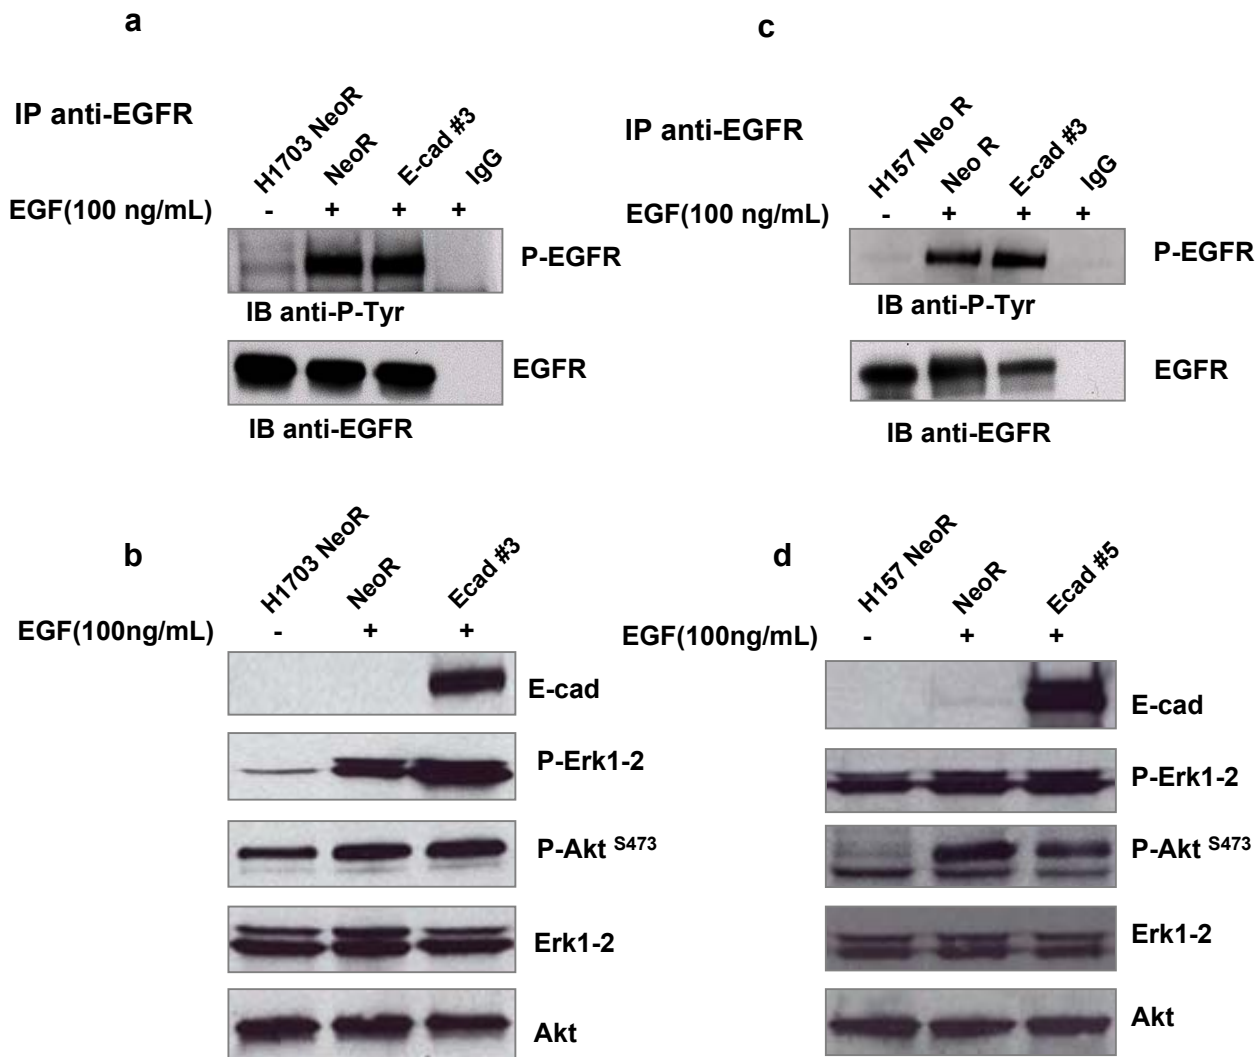

**Figure S4**

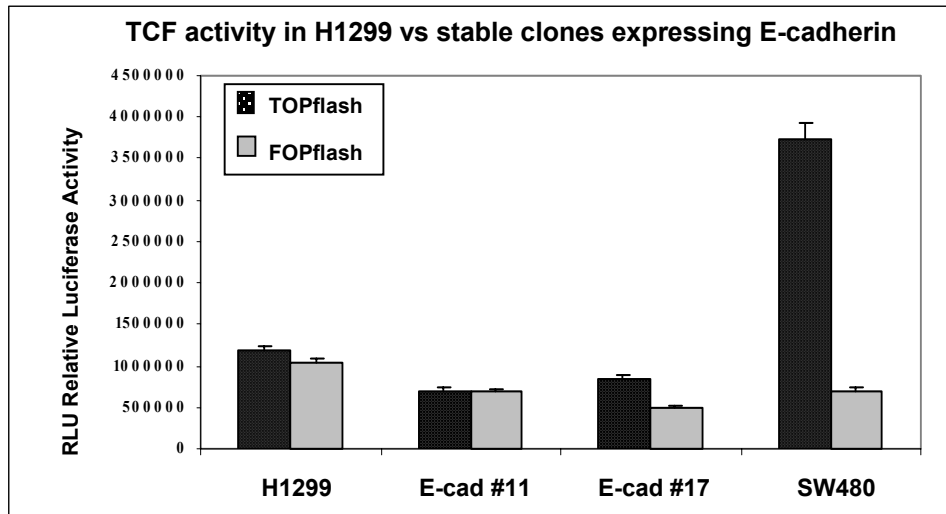

**Figure S5**

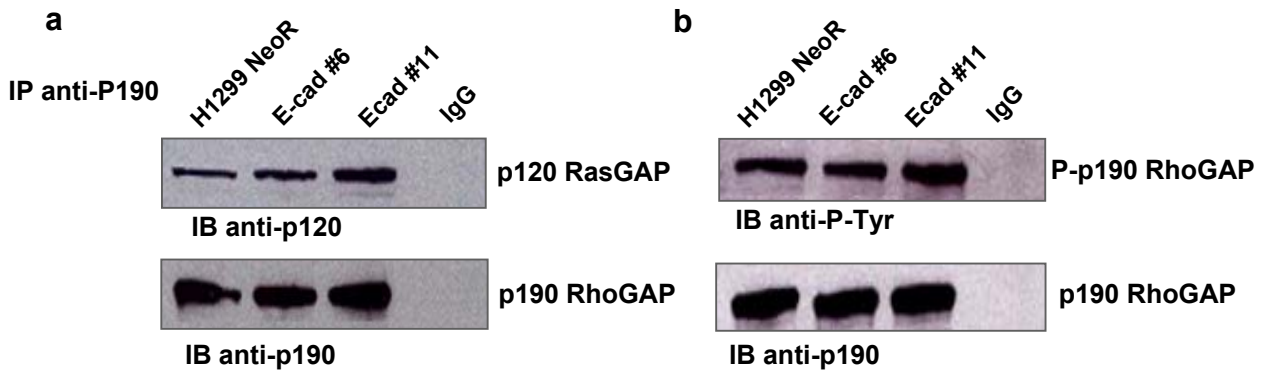

Supplement: NIHMS367984-supplement-Sup_Fig_S2-S5.pdf [file NIHMS367984-supplement-Sup_Fig_S2-S5.pdf]
